# Supplementary material
Source: PubMed Central journal article supplement (PMC4552082)

## Supplementary Information

# S1. Score Plot for dp4 CSA/DS [M-3H]<sup>3-</sup>

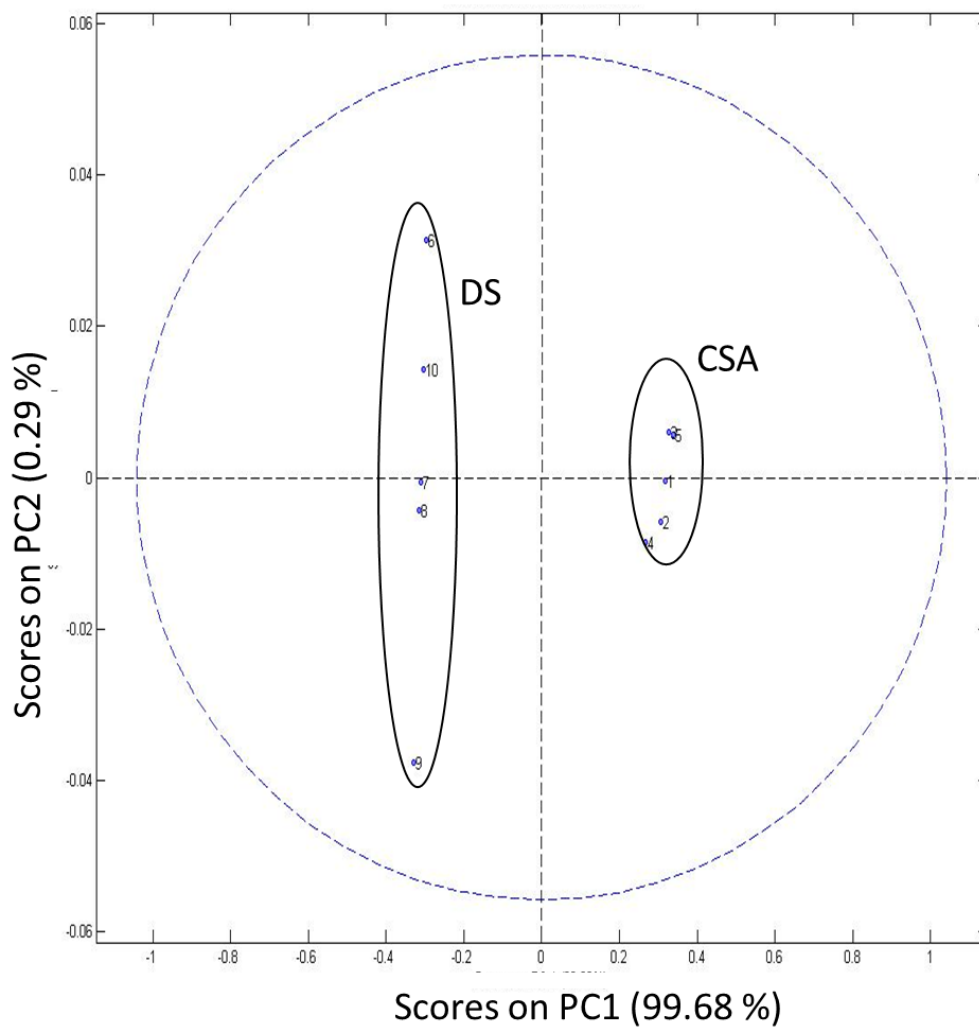

## S2. Loadings Plot for dp4 CSA/DS [M-3H]<sup>3-</sup>

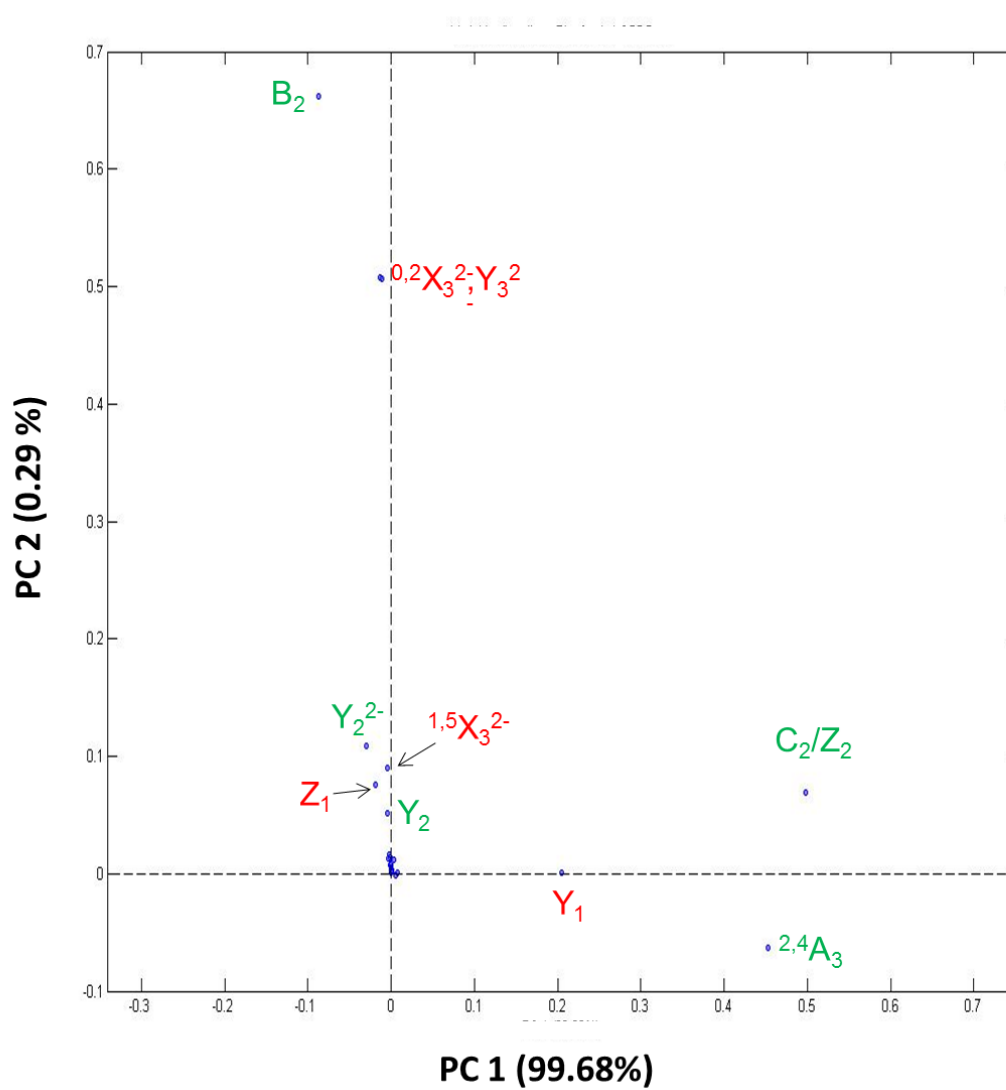

### S3. Score Plot for dp6 CSA/DS [M-5H+Na]<sup>4-</sup>

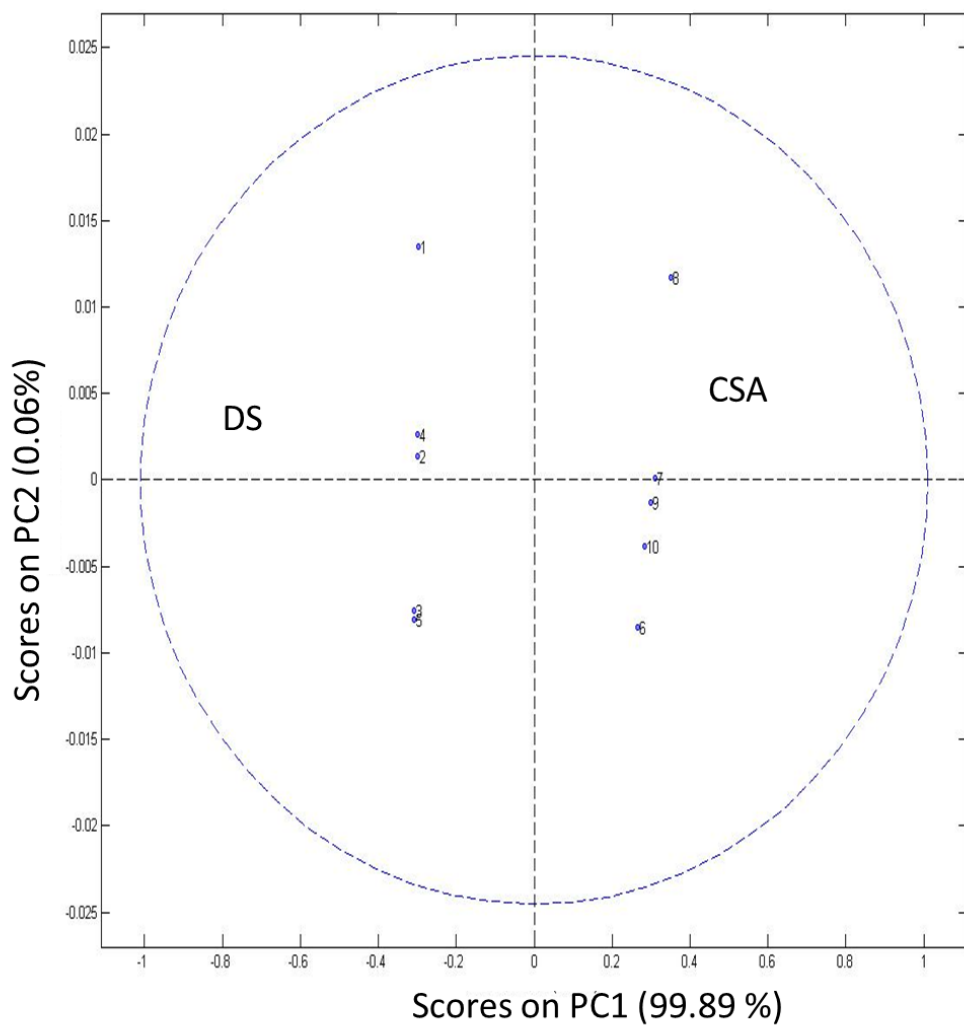

## S4. Loadings Plot for dp6 CSA/DS [M-5H+Na]<sup>4-</sup>

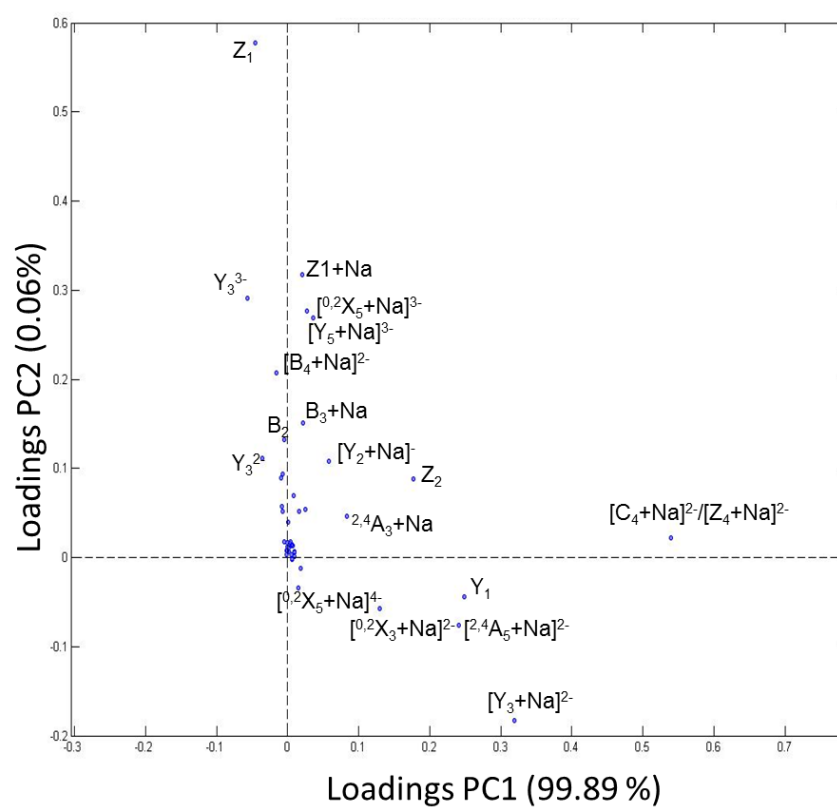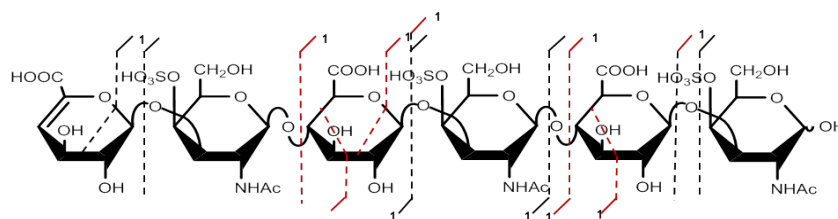

## S5. Dp8 CID spectra

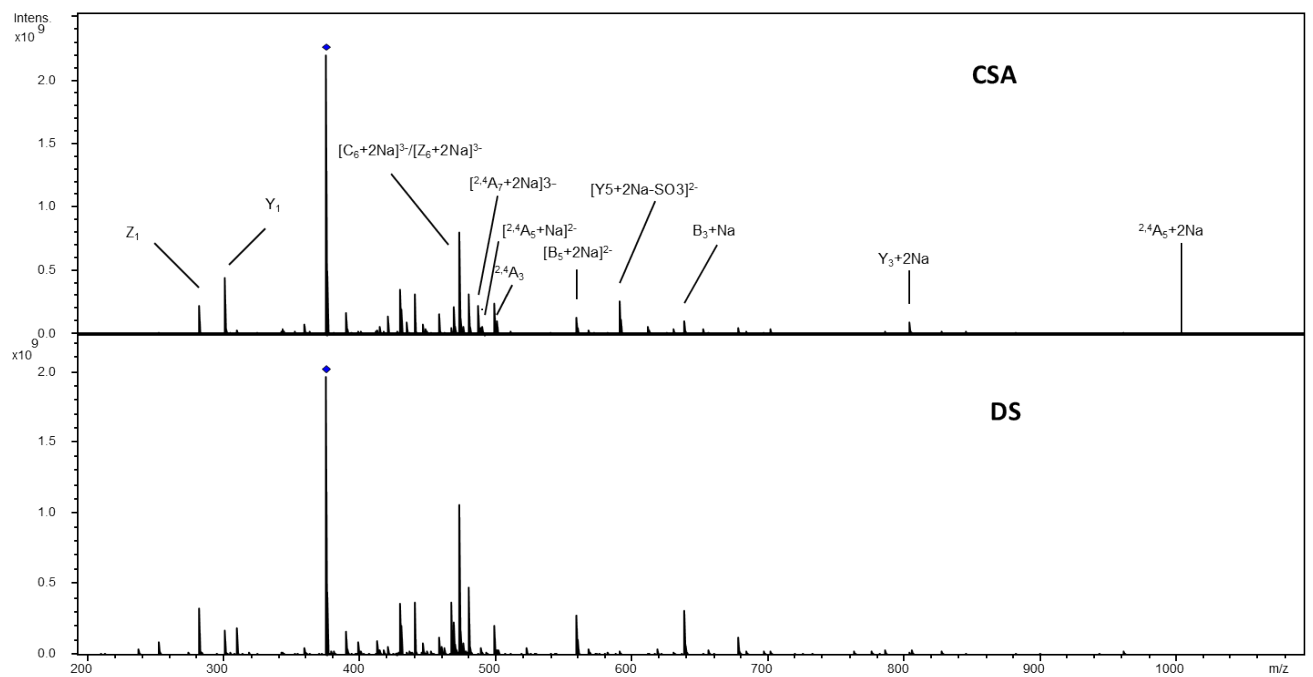

## S6. Score Plot for dp8 CSA/DS [M-7H+2Na]<sup>5-</sup>

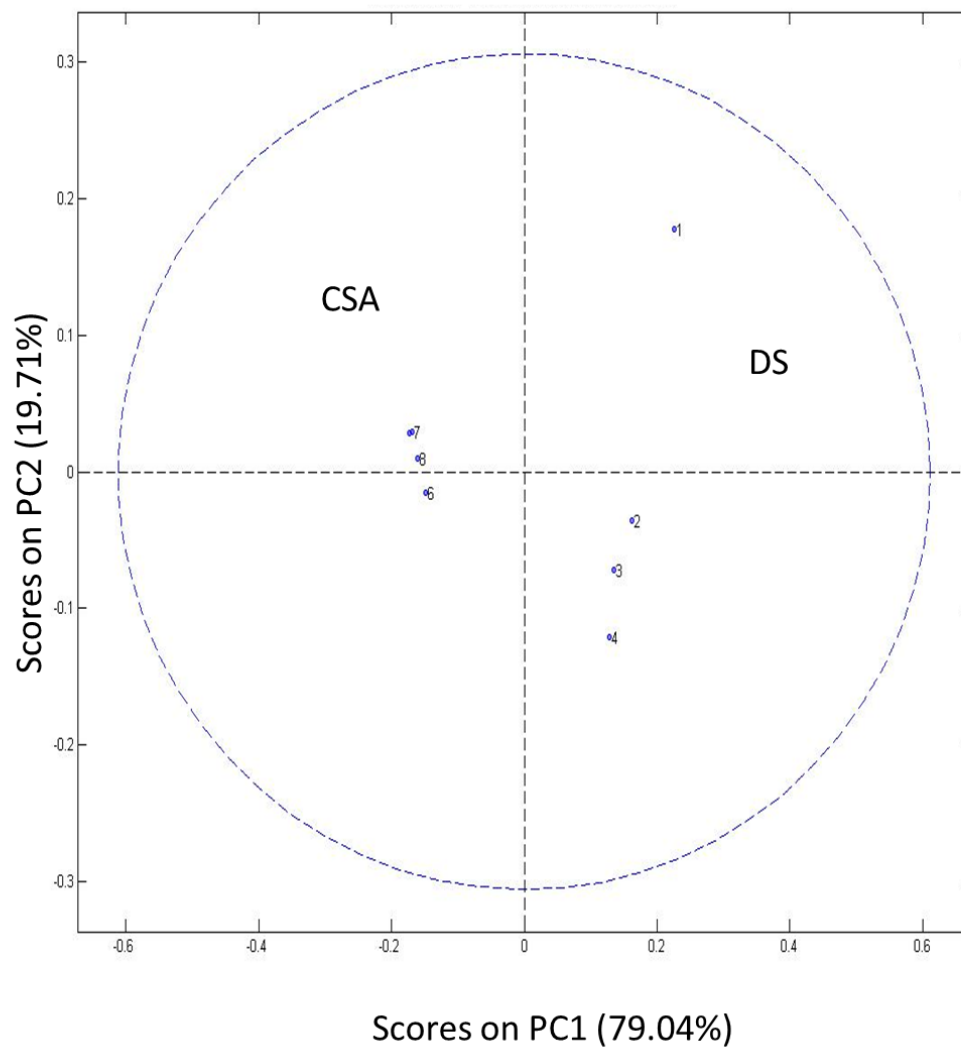

## S7. Loadings Plot for dp8 CSA/DS [M-7H+2Na]<sup>5-</sup>

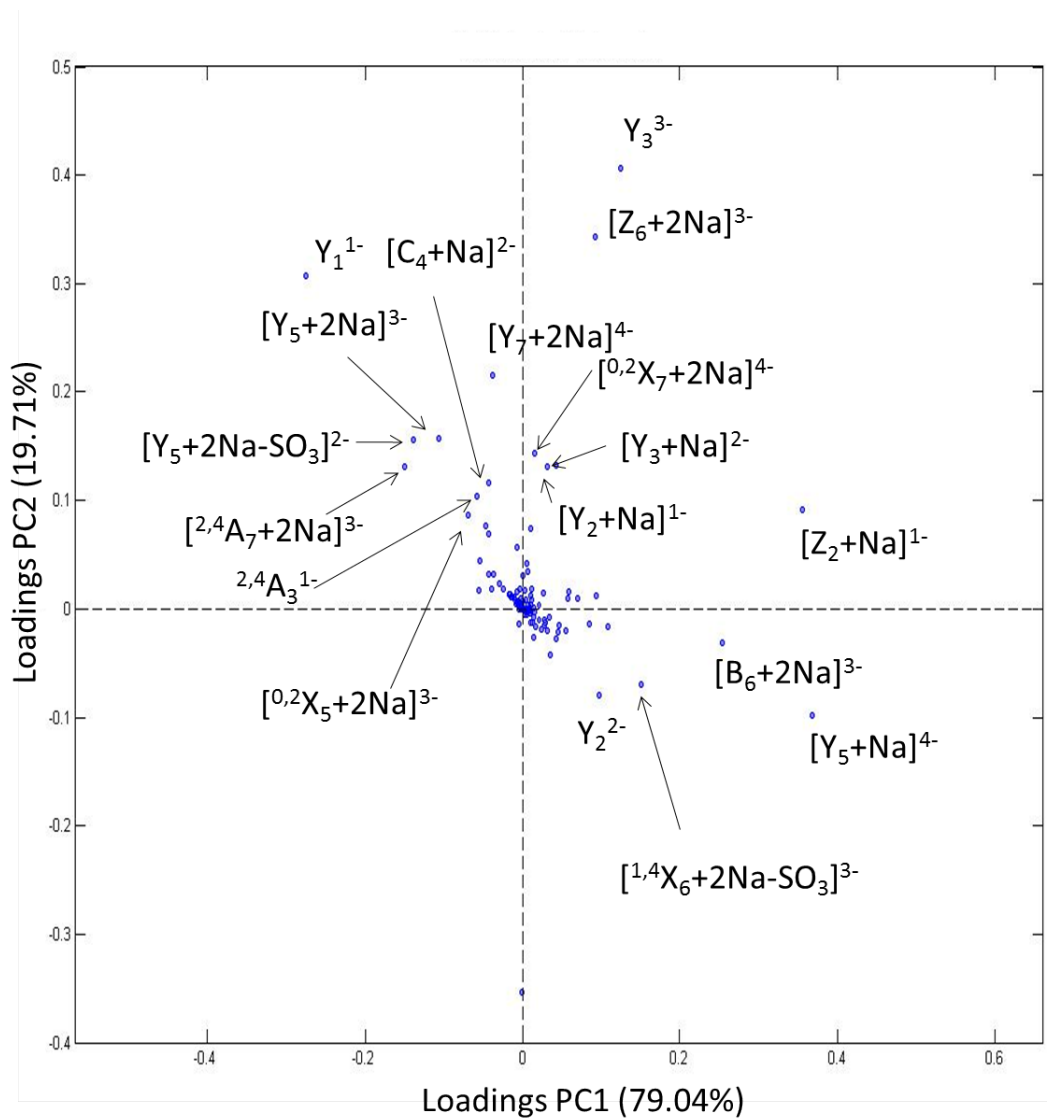



## S8. Dp10 CSDS

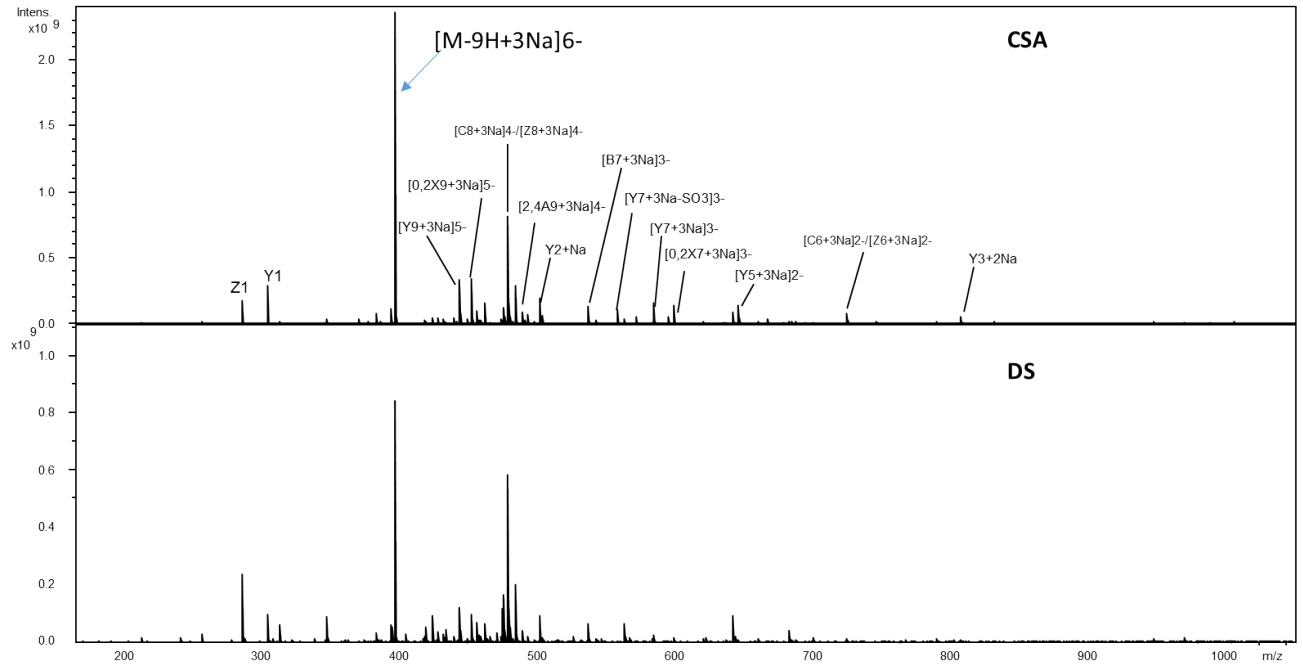

### S9. Score Plot for dp10 CSA/DS [M-9H+3Na]<sup>6-</sup>

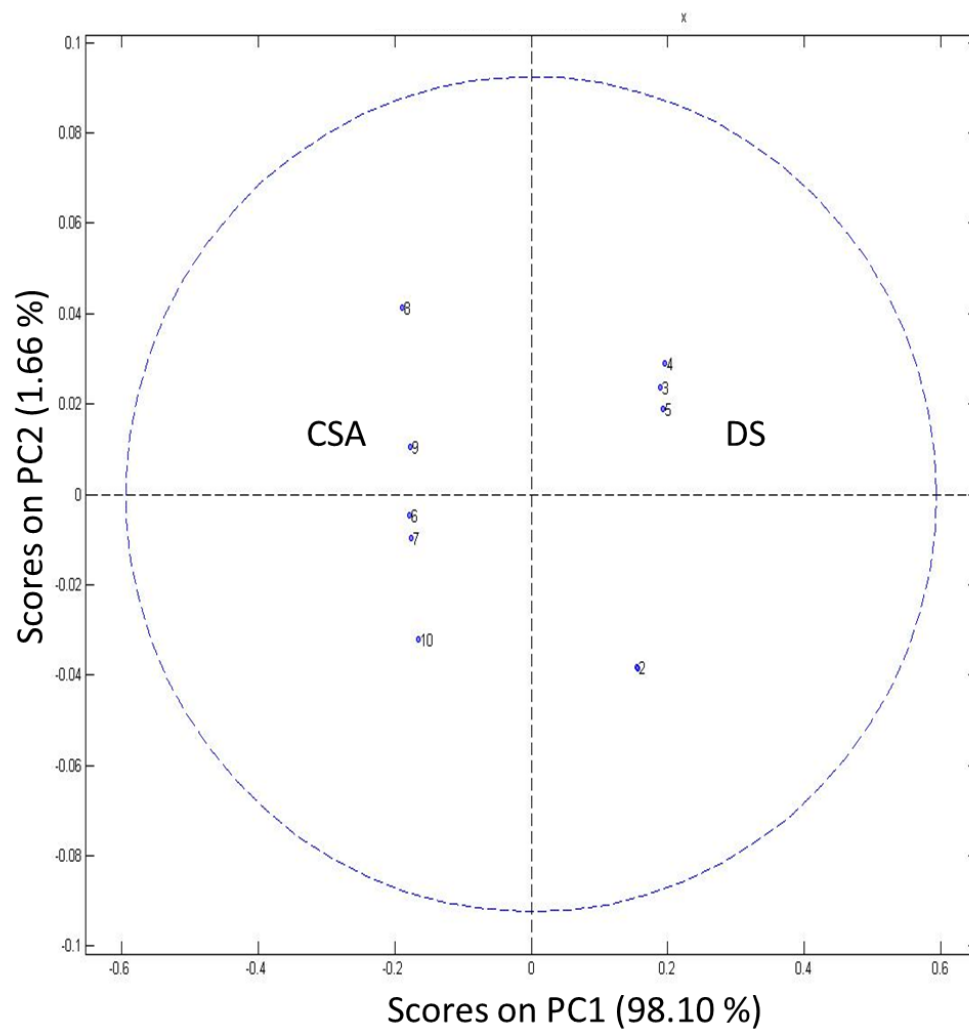

### S10. Loadings Plot for dp10 CSA/DS [M-9H+3Na]<sup>6-</sup>

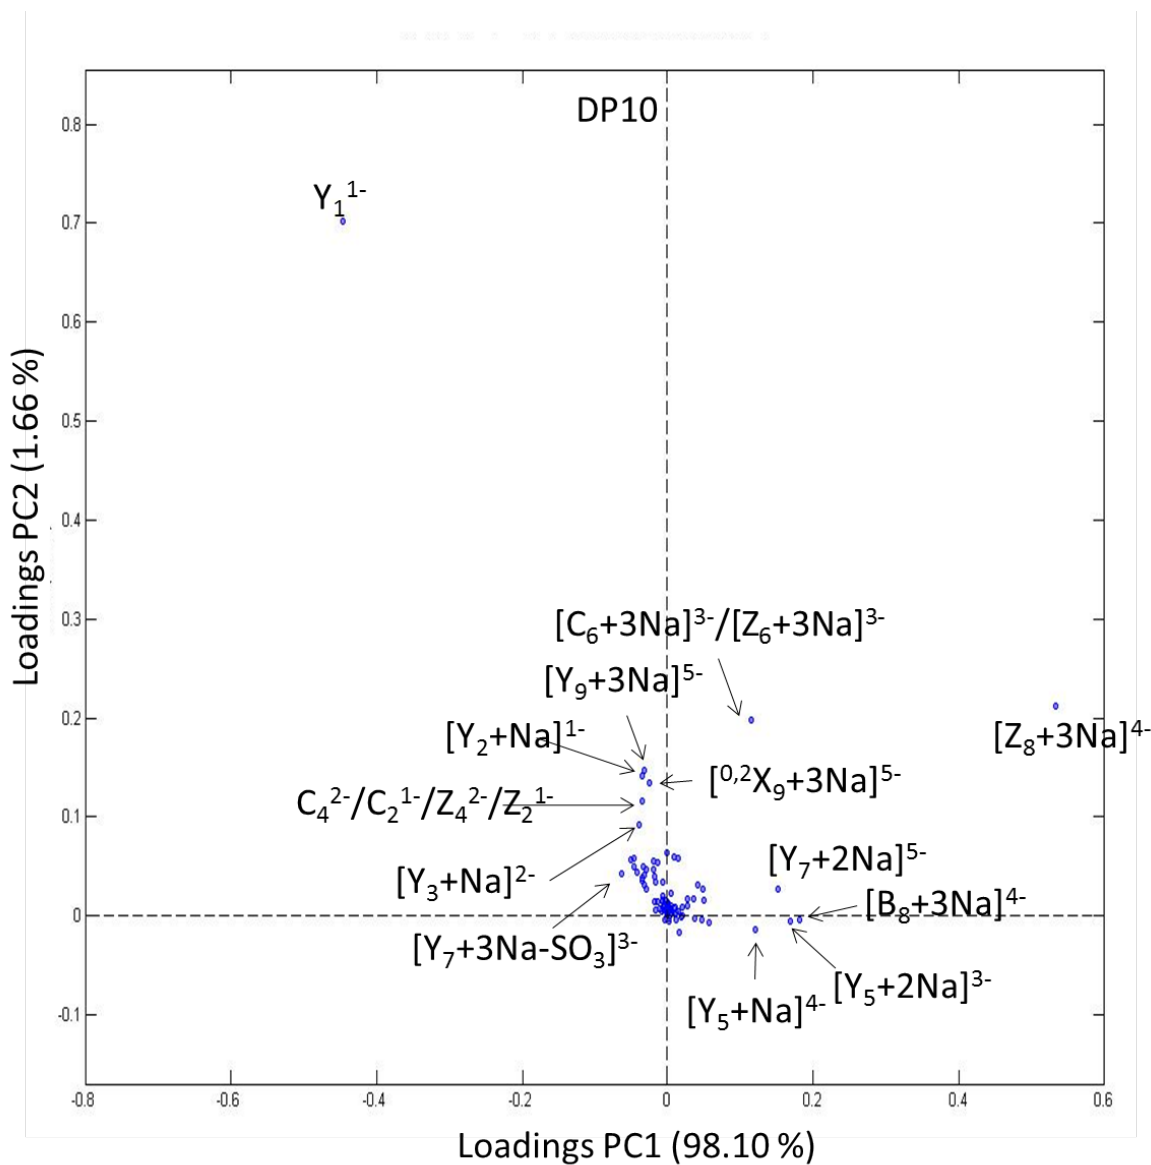

Supplement: NIHMS703588-supplement-supplement_1.pdf [file NIHMS703588-supplement-supplement_1.pdf]
